# Supplementary material for: Development of an antibacterial nanocomposite hydrogel for human dental pulp engineering
Source: Royal Society of Chemistry journal article supplement (doi:10.1039/d0tb00989j), 2020-01-01
Supplement: d0tb00989j1.pdf [file d0tb00989j1.pdf]

## SUPPLEMENTARY INFORMATION

### SI1: Clindamycin detection by HPLC and stability

CLIN was quantified by HPLC with a UV-Vis detector and the standard curve is reported below (left panel). Clindamycin was stable over time under our experimental conditions (right panel).

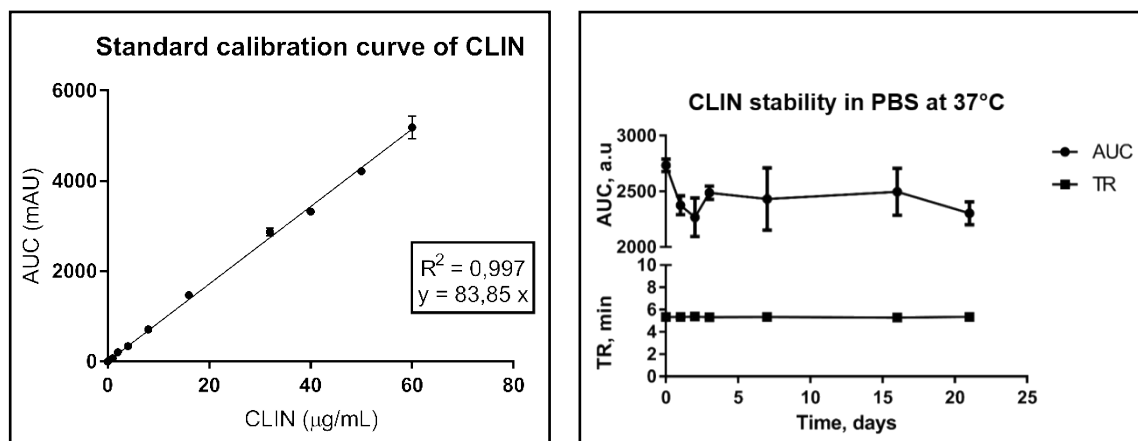

## S12: Calibration curve of PLA-fluo NPs and fluorescence release

Fluorescence intensity was linearly proportional to the concentration of fluorescent particles in PBS at 37°C and in the range of particle concentration ( $R^2 > 0.99$ ) used to assess PLA-fluo NPs release from hydrogels (left panel).

The fluorescence release was assessed after 4 days of fluorescent particles' incubation in PBS at 37°C (right panel). At days 0 and 4, particles were centrifuged for 20 min at 16,000 g to pellet them, and the fluorescence released by the supernatants ( $IF_{sup}$ ) and non-centrifuged particles ( $IF_{total}$ ) was measured. The ratios between the two fluorescence intensity values are given below.

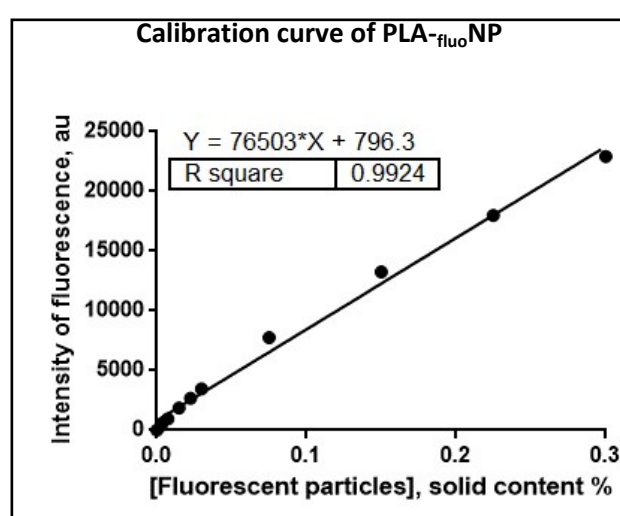

### Release of fluorescence from PLA-fluo NP after 4 days in PBS at 37°C.

|                             | Day 0 | Day 4 |
|-----------------------------|-------|-------|
| Ratio $IF_{sup}/IF_{total}$ | 0,020 | 0,024 |
